# Supplementary material for: A coupled chlorinase–fluorinase system with a high efficiency oftrans-halogenation and a shared substrate tolerance
Source: Royal Society of Chemistry journal article supplement (doi:10.1039/c8cc04436h), 2018-01-01
Supplement: c8cc04436h1.pdf [file c8cc04436h1.pdf]

## **Supporting Information**

### **A coupled chlorinase-fluorinase system with high efficiency of trans-halogenation and a shared substrate tolerance**

Huihua Sun, Huimin Zhao,\* Ee Lui Ang\*

|                            | Page |
|----------------------------|------|
| Experimental Methods.....  | 2    |
| Supplementary Figures..... | 4    |
| Supplementary Table.....   | 9    |
| Protein Sequences.....     | 10   |
| References.....            | 11   |

## Experimental Methods

### Chemicals

5'-CIDA, 5'-FDA, 5'-CIDEA and 5'-FDEA were chemically synthesized as described previously<sup>1,2</sup>. L-Met, L-SeMet, and SAM were purchased from Sigma-Aldrich.

### Halogenase expression in *E. coli* and purification

The genes encoding the halogenases (protein sequences are listed on Page 8) were synthesized (GenScript) and cloned into the expression vector pET28a (Novagen) using the *Nde*I and *Xho*I restriction sites. The plasmids harboring the halogenase genes were transformed into *E. coli* BL21 (DE3) strain. The *E. coli* containing the plasmid was grown in LB medium with 50  $\mu\text{g mL}^{-1}$  kanamycin at 37°C until an absorbance of 0.6 at 600 nm was reached. Overexpression was induced by adding 0.2 mM isopropylthiogalactoside (IPTG) and incubation was continued at 18°C for 20 h. Cells were harvested by centrifugation (3830 x *g* for 20 min). The cell pellet was resuspended in 20 mL binding buffer (50 mM sodium phosphate buffer, pH 7.8, 300 mM NaCl, 5 mM imidazole, 10% glycerol) and the cells were lysed using a cell disruptor (Constant Systems) at 38.7 kPSI. The lysate was then centrifuged and the clarified supernatant was added to TALON metal affinity resin (Clontech). The supernatant-resin mixture was incubated at 4°C with rotation for 1 h. The His-tagged protein bound resin was washed with the binding buffer and eluted with the elution buffer (50 mM sodium phosphate buffer, pH 7.8, 300 mM NaCl, 250 mM imidazole, 10% glycerol). The elution was desalted using PD-10 desalting column (GE Healthcare) in storage buffer (50 mM sodium phosphate buffer, pH 7.8, 10% glycerol). The eluted protein was then concentrated using a 30 kDa concentrator (Sartorius) with centrifugation at 6000 x *g*. Its purity was determined to be > 90% by SDS-PAGE (**Figure S8**). The protein concentration was measured using a NanoDrop 2000 spectrophotometer (Thermo Scientific). The extinction coefficient was determined using the ExPASy ProtParam tool. The protein yields for CIA1 and CIA2 were about 10 mg from 500 mL culture.

### Rate-limiting step determination (as shown in scheme 1):

For all the enzymatic reactions, the reaction buffer is 50 mM sodium phosphate buffer with 10% glycerol at pH 7.8.

*Conversion of 5'-CIDA to 5'-FDA*: 0.2 mM 5'-CIDA, 80 mM NaF, 0.1 mM L-Met, 50  $\mu\text{M}$  FIA4.

*Conversion of 5'-CIDA to SAM*: 0.2 mM 5'-CIDA, 0.1 mM L-Met, 50  $\mu\text{M}$  FIA4.

*Conversion of SAM to 5'-FDA*: 0.2 mM SAM, 80 mM NaF, 50  $\mu\text{M}$  FIA4.

All reactions were carried out in triplicate and were incubated at 47°C for 10 min. Reactions were stopped by heating the samples at 95°C for 1 min. The precipitated protein was then removed by centrifugation at 20000 x *g* for 10 min. The supernatant was used for HPLC analysis.

### Kinetic assays

*Conversion of SAM to 5'-CIDA*: To determine the enzyme kinetics for the substrate Cl<sup>-</sup>, the enzyme was incubated with various concentrations of NaCl and 200  $\mu\text{M}$  SAM at initial time points. To determine the enzyme kinetics for the substrate SAM, the enzyme was incubated with various concentrations of SAM and 200 mM NaCl at initial time points.

*Conversion of 5'-CIDA to SAM:* To determine the enzyme kinetics for the substrate 5'-CIDA, the enzyme was incubated at various concentrations of 5'-CIDA and 20 mM L-Met at initial time points.

1  $\mu\text{M}$  enzyme was used for kinetic assays for Sall, CIA1 and CIA2. 5  $\mu\text{M}$  enzyme was used for kinetic assays for FIA4. All the reactions were carried out at 37°C and were stopped by heating the samples at 95°C for 1 min. Kinetic parameters were obtained by the best-fit model of initial velocity against substrate concentrations based on Michaelis-Menten equation using GraphPad Prism 7 (GraphPad Software).

### **Trans-halogenation by the coupled fluorinase-chlorinase system**

*Coupled fluorinase-chlorinase system:* 50  $\mu\text{M}$  FIA4, and 30  $\mu\text{M}$  chlorinase, 0.2 mM 5'-CIDA/5'-CIDEA, 80 mM NaF, 0.1 mM L-Met/L-seMet.

Reactions without chlorinase were run with 50  $\mu\text{M}$  or 80  $\mu\text{M}$  FIA4 for comparison.

All reactions were carried out in triplicate at 37°C for 1 h. Reactions were stopped by heating the samples at 95°C for 1 min. The precipitated protein was then removed by centrifugation at 20000 x *g* for 10 min. The supernatant was used for HPLC analysis.

### **HPLC analysis**

HPLC analysis was carried out using Shimadzu Prominence system UFLC (Shimadzu). Mobile phase A: 0.1% formic acid in water; B: 0.1% formic acid in methanol. Phenomenex, Kinetex® 2.6  $\mu\text{m}$  Biphenyl 100 Å, LC Column 150 x 4.6 mm, 0.6 mL min<sup>-1</sup> flow rate, gradient elution, 5 – 95% B for 15 min. Quantification is based on the standard curve of the peak area against various concentrations of the compound.

## Supplementary Figures

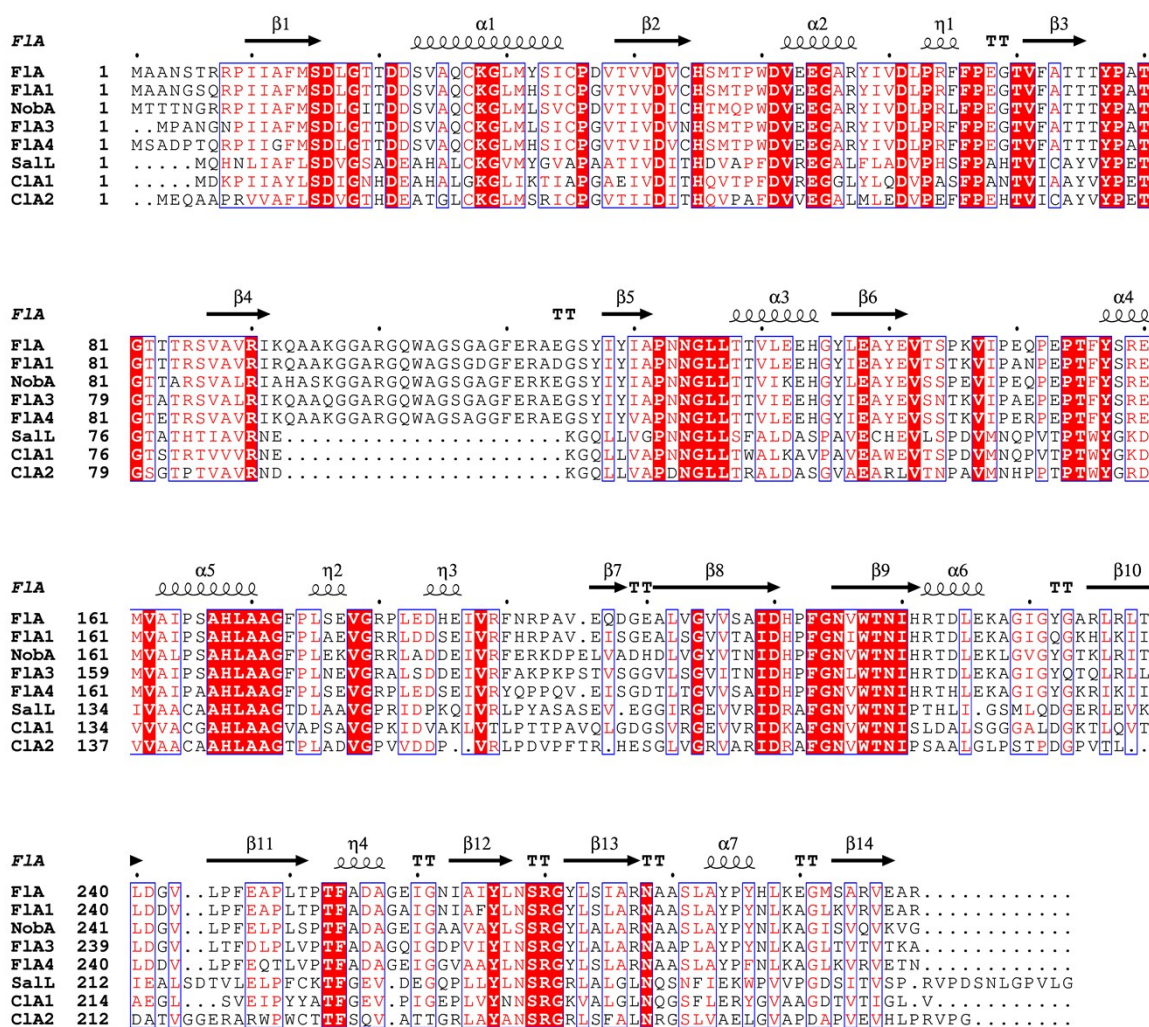

**Figure S1.** Multiple sequence alignment of 3 chlorinases and 5 fluorinases (FIA<sup>3, 4</sup> from *Streptomyces cattleya*, FIA1<sup>5</sup> from *Streptomyces* sp. MA37, NobA<sup>5, 6</sup> from *Nocardia brasiliensis*, FIA3<sup>5</sup> from *Actinoplanes* sp. N902-109, and FIA4<sup>7, 8</sup> from *Streptomyces xinghaiensis*). The secondary structure of FIA is based on PDB 1RQP. Sequence alignment was produced by ESPrpt 3.0, with pre-alignment input from Clustal Omega. The protein sequences are in Page 10 of the supplementary information.

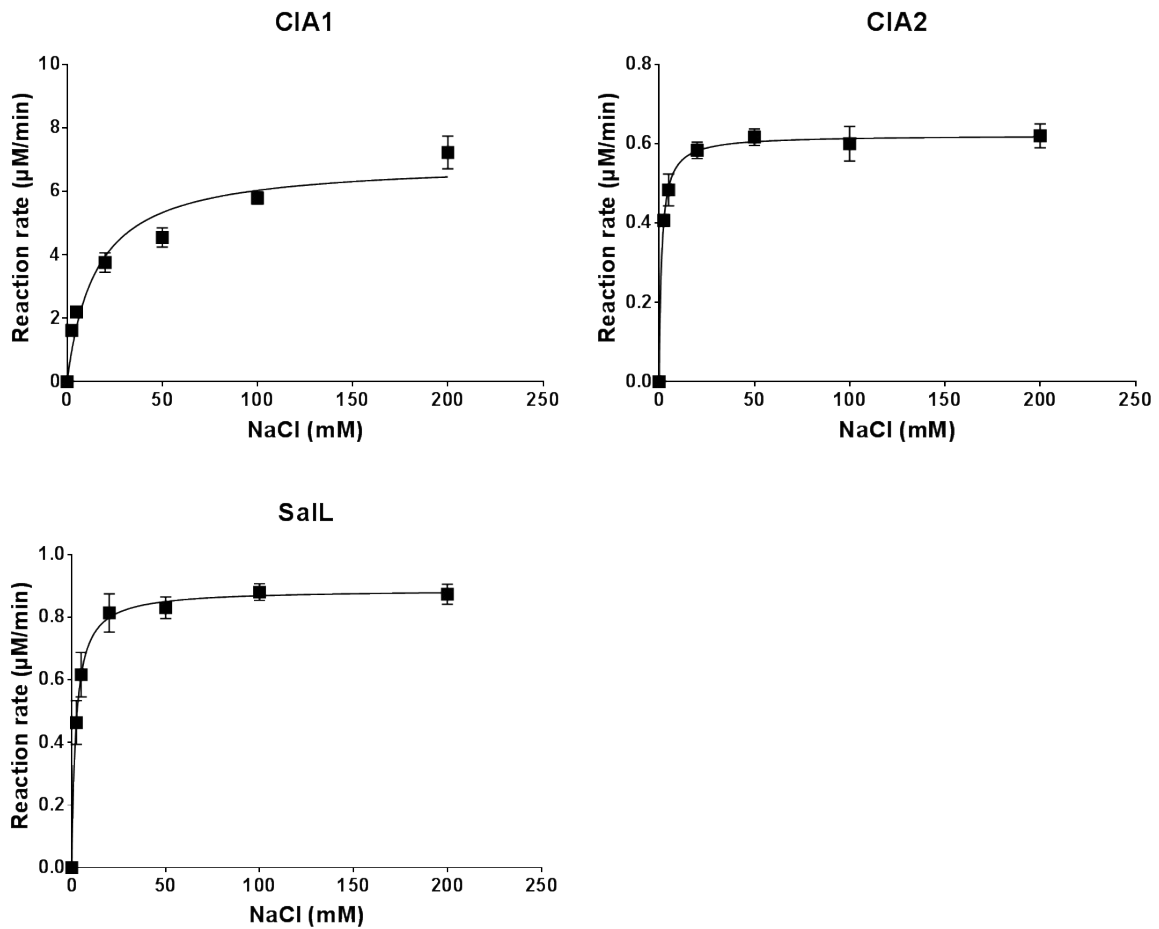

**Figure S2.** Kinetic assays of CIA1, CIA2 and SalL for the conversion of SAM to 5'-CIDA. Assays contain 100 µM SAM and various concentrations of NaCl.

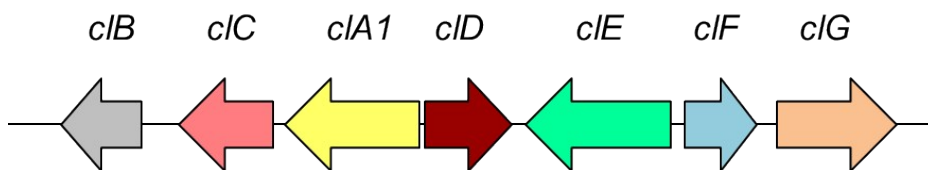

**Figure S3.** *cIA1* and neighboring genes shared among multispecies of *Streptomyces*. Genes and the putative proteins encoded by the genes: *cIB*, hypothetical protein (WP\_016573067); *cIC*, methyltransferase type 11 (WP\_016573068.1); *cID*, NAD(P)-dependent oxidoreductase (WP\_038524328, WP\_037634555, WP\_044380525); *cIE*,  $\gamma$ -butyrolactone biosynthesis enzyme (WP\_016573071); *cIF*,  $\gamma$ -butyrolactone receptor protein (WP\_016573072); *cIG*, short chain dehydrogenase (WP\_078486931),

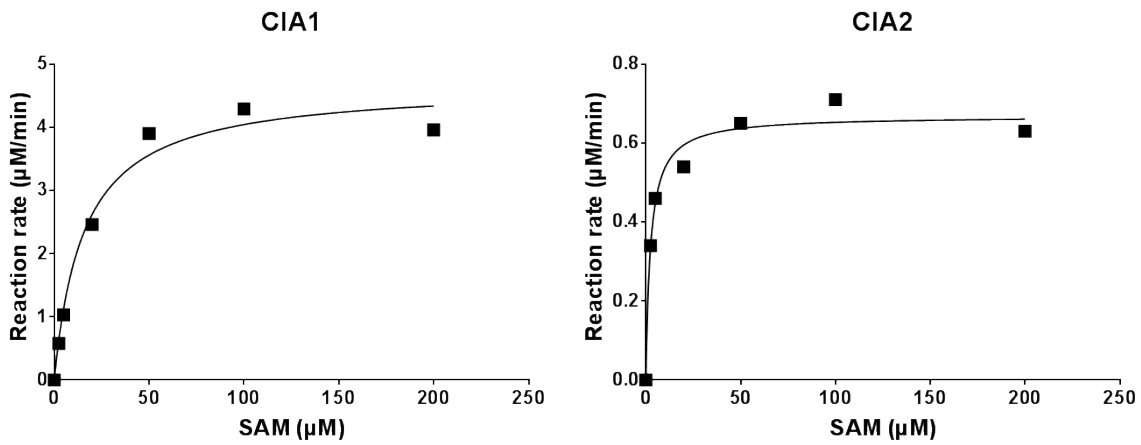

**Figure S4.** Kinetic assays of CIA1 and CIA2 for the conversion of SAM to 5'-CIDA. Assays contain 200 mM NaCl and various concentrations of SAM.

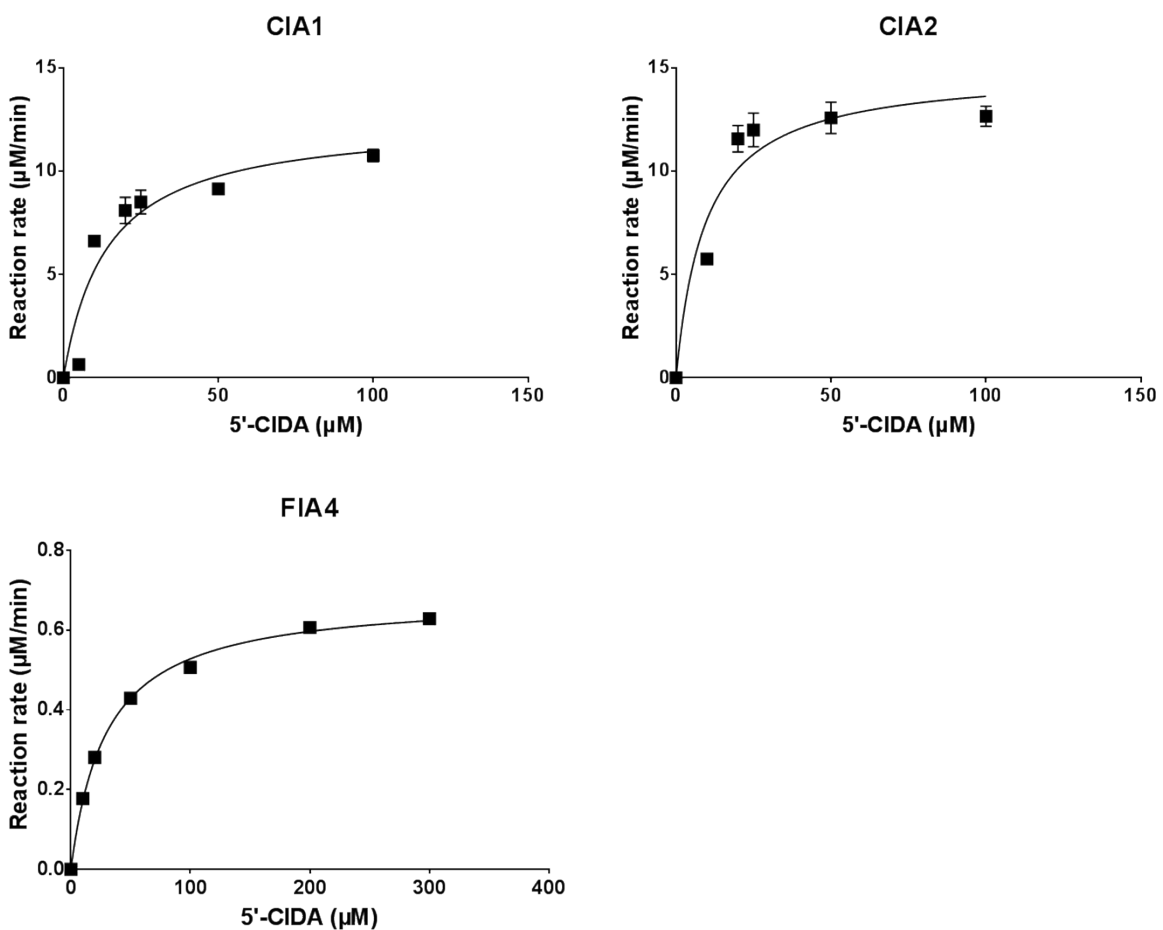

**Figure S5.** Kinetic assays of CIA1, CIA2 and FIA4 for the conversion of 5'-CIDA to SAM. Assays contain 20 mM L-Met and various concentrations of 5'-CIDA.

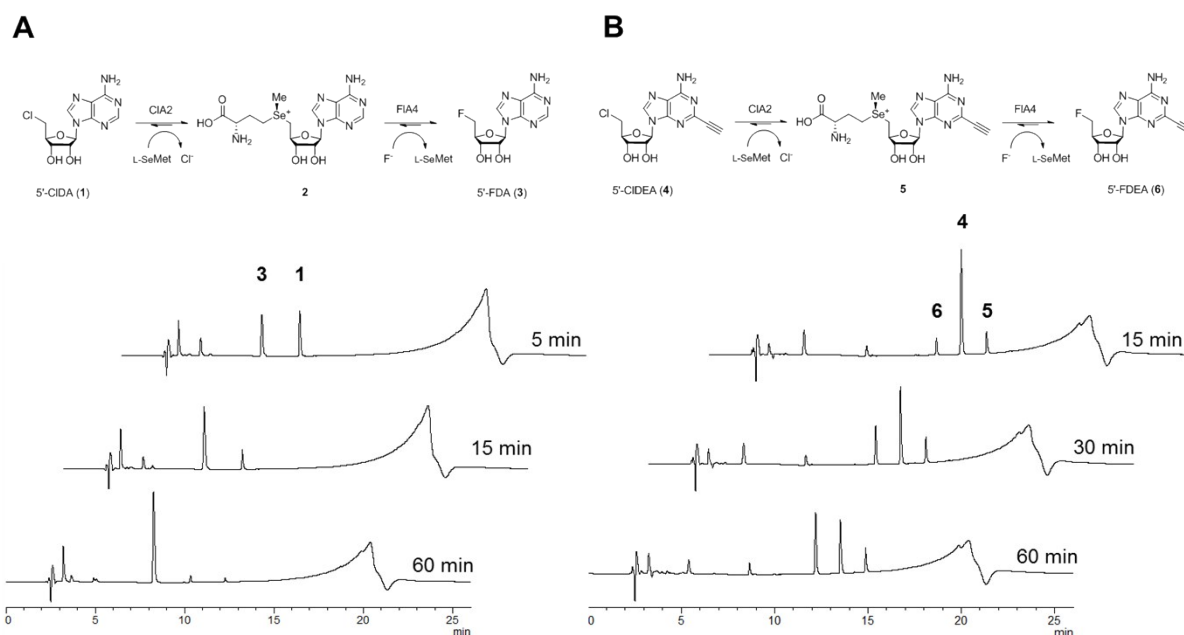

**Figure S6.** (A) HPLC traces (258 nm) showing the trans-halogenation of 5'-CIDA (**1**) to 5'-FDA (**3**) by FIA4 coupled to CIA2. (B) HPLC traces (268 nm) showing the trans-halogenation of 5'-CIDEA (**4**) to 5'-FDEA (**6**) by FIA4 coupled to CIA2.

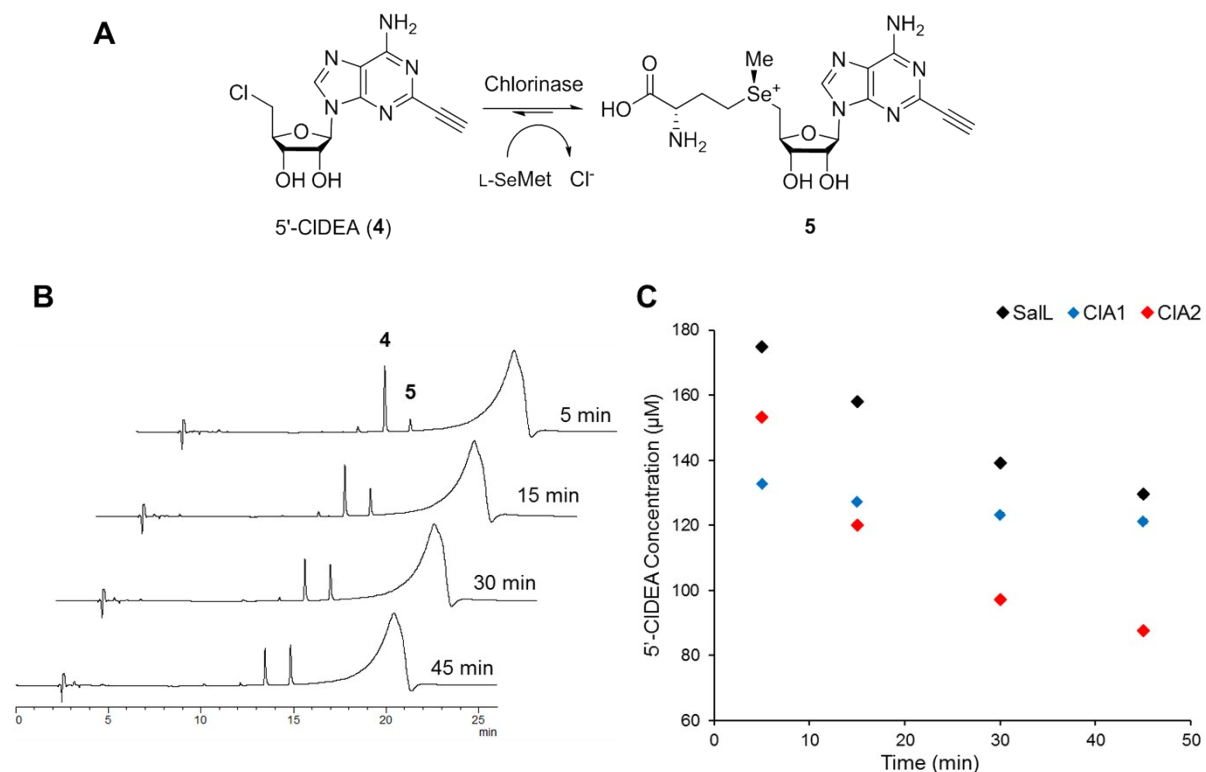

**Figure S7.** (A) Scheme for the conversion of 5'-CIDEA (**4**) to its SAM derivative **5** by the chlorinase. (B) HPLC traces (268 nm) showing the conversions of **4** to **5** by CIA2 at 5, 15, 30 and 45 min. (C) Comparison of the consumption rates of 5'-CIDEA by the three chlorinases (SaIL, CIA1 and CIA2). Each reaction contains 30 μM chlorinase, 0.2 mM 5'-CIDEA and L-SeMet. Reactions were incubated at 37°C

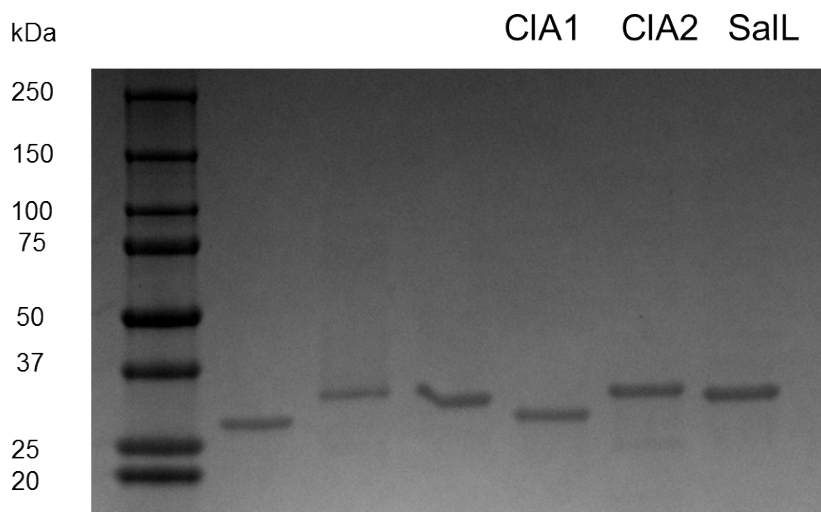

**Figure S8.** SDS-PAGE gel of purified CIA1, CIA2 and SaIL.



## Supplementary Table

**Table S1.** Reactions catalyzed by FIA4 as shown in Scheme 1.

| Reaction                                       | Product yield (%)     |
|------------------------------------------------|-----------------------|
| Conversion of 5'-CIDA to 5'-FDA <sup>[a]</sup> | 1.04 ± 0.01 (5'-FDA)  |
| Conversion of 5'-CIDA to SAM <sup>[b]</sup>    | 2.60 ± 0.13 (SAM)     |
| Conversion of SAM to 5'-FDA <sup>[c]</sup>     | 55.31 ± 0.33 (5'-FDA) |

All reactions were carried out in triplicate and were incubated at 47°C for 10 min. Reaction conditions: [a] 0.2 mM 5'-CIDA, 80 mM NaF, 0.1 mM L-Met, 50 µM FIA4. [b] 0.2 mM 5'-CIDA, 0.1 mM L-Met, 50 µM FIA4. [c] 0.2 mM SAM, 80 mM NaF, 50 µM FIA4.

**Table S2.** The newly identified SAM-dependent chlorinases.

| Protein Name | Identity / Similarity to SalL <sup>[a]</sup> | Secondary Cluster <sup>[b]</sup> | Metabolite | Organism                                               |
|--------------|----------------------------------------------|----------------------------------|------------|--------------------------------------------------------|
| CIA1         | 59.6% /<br>73.3%                             | γ-Butyrolactone                  |            | <i>Streptomyces albulus</i> CCRC 11814                 |
|              |                                              |                                  |            | <i>S. albulus</i> PD-1                                 |
|              |                                              |                                  |            | <i>S. albulus</i> ZPM                                  |
|              |                                              |                                  |            | <i>S. albulus</i> NK660                                |
|              |                                              |                                  |            | <i>S. ahygroscopicus</i> subsp. <i>wuyiensis</i> CK-15 |
| CIA2         | 52.7% /<br>62.7%                             | Unknown <sup>[c]</sup>           |            | <i>Umezawaea tangerina</i> NRRL B-24463                |

[a] The identity and similarity were determined using Pairwise Sequence Alignment via EMBOSS Needle ([https://www.ebi.ac.uk/Tools/psa/emboss\\_needle/](https://www.ebi.ac.uk/Tools/psa/emboss_needle/)).

[b] Secondary metabolite clusters were predicted by antiSMASH 4.0.

[c] Assembly gaps in the genome sequence around *cIA2* made it difficult for prediction.

**Table S3.** Comparative kinetic data for SalL, CIA1, and CIA2 for the chlorination reactions with 200 µM SAM and various concentrations of NaCl.

| Enzyme | Cl <sup>-</sup> $K_M$ (mM) | $k_{cat}$ (min <sup>-1</sup> ) | $[k_{cat}/K_M]$ (mM <sup>-1</sup> min <sup>-1</sup> ) |
|--------|----------------------------|--------------------------------|-------------------------------------------------------|
| SalL   | 2.24                       | 0.89 ± 0.01                    | 0.40                                                  |
| CIA1   | 15.13                      | 6.94 ± 0.34                    | 0.46                                                  |
| CIA2   | 1.35                       | 0.62 ± 0.01                    | 0.46                                                  |

## Protein Sequences

>SalI

MQHNLI AFLSDVGSAD EAHALCKGVMYGVAPAATIVDITHDVAPFDVREGALFLADVPHSFP AHTVIC  
AYVYPETGTATH TIAVRNEKGQLLVGPNNGLLSFALDASPAVECHEV LSPDVMNQPV TPTWY GKDIV  
AACAAHLAAGTDLAAVGPRI DPKQIVRLPYASASEVEGGIRGEVVRIDRAFGNVW TNIPTHLIGSMLQD  
GERLEVKIEALS DTVLEL PFCCKTFGEVDEGQPLLYLNSRGR LALGLNQSNFIEKWPV VPGDSITVSPR  
VPDSNLGPV LG

>CIA1

MDKPIIAYLS DIGNHDEAHALGKGLIKTIAPGAEIVDITHQVTPFDVREGGLYLQDVPASFPANTVIAAYV  
YPETGTSTR TVVRNEKGQLLVAPNNGLLT WALKAVPAVEAWEVTSPDVMNQPV TPTWY GKDVVVA  
CGAHLAAGVAPS AVGPKIDVAKLVTLPTTPAVQLGDG SVRGEVVRIDKAFGNVW TNISLDALSGGGA  
LDGKTLQVTA EGLSVEIPYYATFGEVPIGEPLVYNN SRGKVALGLNQGSFLERYGVAAGDTVTIGLV

>CIA2

MEQAAPRVVAF LSDVGTHDEATGLCKGLMSRICPGVTIIDITHQVPAFDVVEGALMLEDVPEFFPEHT  
VICAYVYPETG SGTPTVAVRNDKGQLLVAPDNGLL TRALDASGVAEARLV TNPAVMNH PPTPTWY G  
RDVVAACAAHLAAGT PLADVGPVVD DPVRLPDVPFTRHESGLVGRVARIDRAFGNVW TNPISAALGL  
PSTPDGPVTL DATVGGERARWPWCTTFSQVATTGRLAYANSRGR LSFALNRGSLVAELGVAPDAPV  
EVHLPRVPG

>FIA

MAANSTRRPIA FMSDLGTTDD SVAQCKGLMYSICPDVTVV DVCHSMT PWDVEEGARYIVDLPRFFP  
EGTVFATTTYPATG TTTTRSVAVRIKQAAKGGARGQWAGSGAGFERAEGSYIYIAPNNGLLTTVLEEH  
GYLEAYEVTSPKVIPEQPEPTFYSREMV AIPSAHLAAGFPLSEVGRPLEDHEIVRFNRPAVEQDGEAL  
VGVVSAIDHPFGNVW TNIHRTDLEKAGIGYGARLRLTLDGVL PFEAPLTPTFADAGEIGNIAIYLNSRG  
YLSIARNAASLA YPYHLKEGMSARVEAR

>FIA1

MAANGSQRPIA FMSDLGTTDD SVAQCKGLMHSICPGVTVV DVCHSMT PWDVEEGARYIVDLPRFFP  
EGTVFATTTYPATG TTTTRSVAVRIRQA AKGGARGQWAGSGDGFERADGSYIYIAPNNGLLTTVLEEH  
GYIEAYEVTSTKVIPANPEPTFYSREMV AIPSAHLAAGFPLAEVGRRLDDSEIVRFHRPAVEISGEALS  
GVVTAIDHPFGNIW TNIHRTDLEKAGIGQGKHLKIILDDVLPFEAPLTPTFADAGAIGNIAFYLN SRGYLS  
LARNAASLA YPYNLKAGLKVRVEAR

>NobA

MTTNGRRPIA FMSDLGITDD SVAQCKGLMLSVC PDVTIVDICTM QPVDVEEGARYIVDLPRLFPE  
GTVFATTTYPATG TTARSVALRIAHASKGGARGQWAGSGAGFERKEGSYIYIAPNNGLLTTVIKEHG  
YLEAYEVSSPEVIPEQPEPTFYSREMV ALPSAHLAAGFPLEKVGRRLADDEIVRFERKDP ELVADHDLV  
GYVTNIDHPFGNVW TNIHRTDLEKLG VGYGTKLRITLDGVL PFEPLSPTFADAGEIGAAVAYLSSRGY  
LALARNAASLA YPYNLKAGISVQVKVG

>FIA3

MPANGNPIA FMSDLGTTDD SVAQCKGLMLSICPGVTIV DVNHSMT PWDVEEGARYIVDLPRFFPEGT  
VFATTTYPATG TATR SVALRIKQAAQGGARGQWAGSGAGFERAEGSYIYIAPNNGLLTTVIEEHGYIE  
AYEVSNTKVIPA EPEPTFYSREMV AIPSAHLAAGFPLNEVGRALSDDEIVRFAKPKPSTVSGGVLSGVI  
TNIDHPFGNLW TNIHRTDLEKAGIGYQTLRLLLDGVLTFDLPLVPTFADAGQIGDPVIYIN SRGYLALA  
RNAAPLAYPYNLKAGLTVTVTKA

>FIA4

MSADPTQRPII GFMSDLGTTDD SVAQCKGLMHSICPGVTIV DVCHSMT PWDVEEGARYIVDLPRFFP  
EGTVFATTTYPATG TETR SVAVRIKQAAKGGARGQWAGSAGGFERAEGSYIYVAPNNGLLTTVLEEH  
GYIEAYEVSSTKVIPERPEPTFYSREMV AIPAAHLAAGFPLSEVGRPLEDSEIVRYQPPQVEISGDTLT  
GVVSAIDHPFGNVW TNIHRTHLEKAGIGYGKRIKIILDDVLPFEQTLVPTFADAGEIGGVAAYLN SRGYL  
SLARNAASLA YPFNLKAGLKVRVETN

## References

1. H. Sun, W. L. Yeo, Y. H. Lim, X. Chew, D. J. Smith, B. Xue, K. P. Chan, R. C. Robinson, E. G. Robins, H. Zhao and E. L. Ang, *Angew. Chem. Int. Ed.*, 2016, **55**, 14277-14280.
2. W. L. Yeo, X. Chew, D. J. Smith, K. P. Chan, H. Sun, H. Zhao, Y. H. Lim and E. L. Ang, *Chem. Commun.*, 2017, **53**, 2559-2562.
3. D. O'Hagan, C. Schaffrath, S. L. Cobb, J. T. G. Hamilton and C. D. Murphy, *Nature.*, 2002, **416**, 279-279.
4. C. Schaffrath, H. Deng and D. O'Hagan, *FEBS Lett.*, 2003, **547**, 111-114.
5. H. Deng, L. Ma, N. Bandaranayaka, Z. Qin, G. Mann, K. Kyeremeh, Y. Yu, T. Shepherd, J. H. Naismith and D. O'Hagan, *Chembiochem*, 2014, **15**, 364-368.
6. Y. Wang, Z. Deng and X. Qu, *F1000Res.*, 2014, **3**, 61.
7. S. Huang, L. Ma, M. H. Tong, Y. Yu, D. O'Hagan and H. Deng, *Org. Biomol. Chem.*, 2014, **12**, 4828-4831.
8. L. Ma, Y. Li, L. Meng, H. Deng, Y. Li, Q. Zhang and A. Diao, *RSC Adv.*, 2016, **6**, 27047-27051.
